# Supplementary material for: Learning and reaction times in mouse touchscreen tests are differentially impacted by mutations in genes encoding postsynaptic interacting proteins SYNGAP1, NLGN3, DLGAP1, DLGAP2 and SHANK2
Source: PubMed Central journal article supplement (PMC7615670; doi:10.1111/gbb.12723), 2020-12-29
Supplement: EMS194239-supplement-Figure_S1.pdf [file EMS194239-supplement-Figure_S1.pdf]

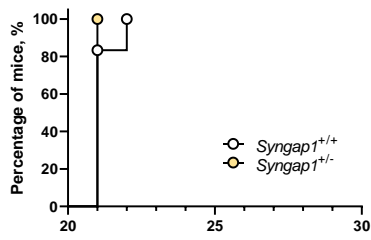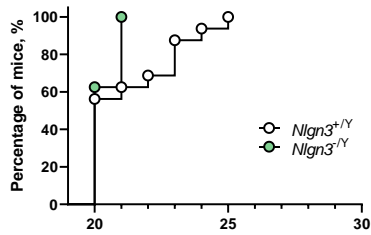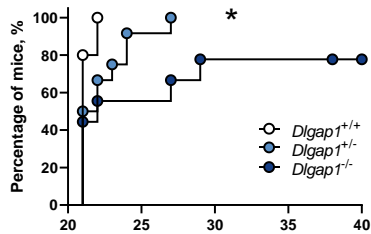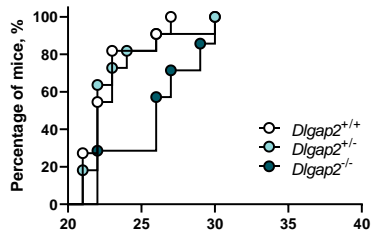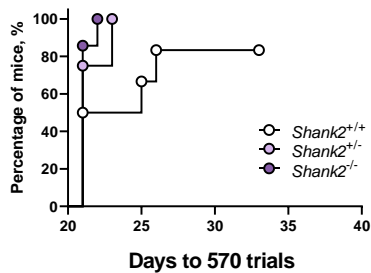

**Supporting Figure 1.** Kaplan-Meier analysis of the number of days required to complete 570 trials in the reversal learning task by mice with loss-of-function mutations in *Syngap1*, *Nlgn3*, *Dlgap1*, *Dlgap2*, *Shank2* and their corresponding WT littermates. Curves were significantly different in the *Dlgap1* cohort (\* $P = 0.015$ , log-rank Mantel-Cox test). Two *Dlgap1*<sup>-/-</sup> mice and one *Shank2*<sup>+/-</sup> mouse were censored as they were withdrawn after 33–40 days of testing due to insufficient levels of responding.
