# Supplementary material for: Learning and reaction times in mouse touchscreen tests are differentially impacted by mutations in genes encoding postsynaptic interacting proteins SYNGAP1, NLGN3, DLGAP1, DLGAP2 and SHANK2
Source: PubMed Central journal article supplement (PMC7615670; doi:10.1111/gbb.12723), 2020-12-29
Supplement: EMS194239-supplement-Figure_S3.pdf [file EMS194239-supplement-Figure_S3.pdf]

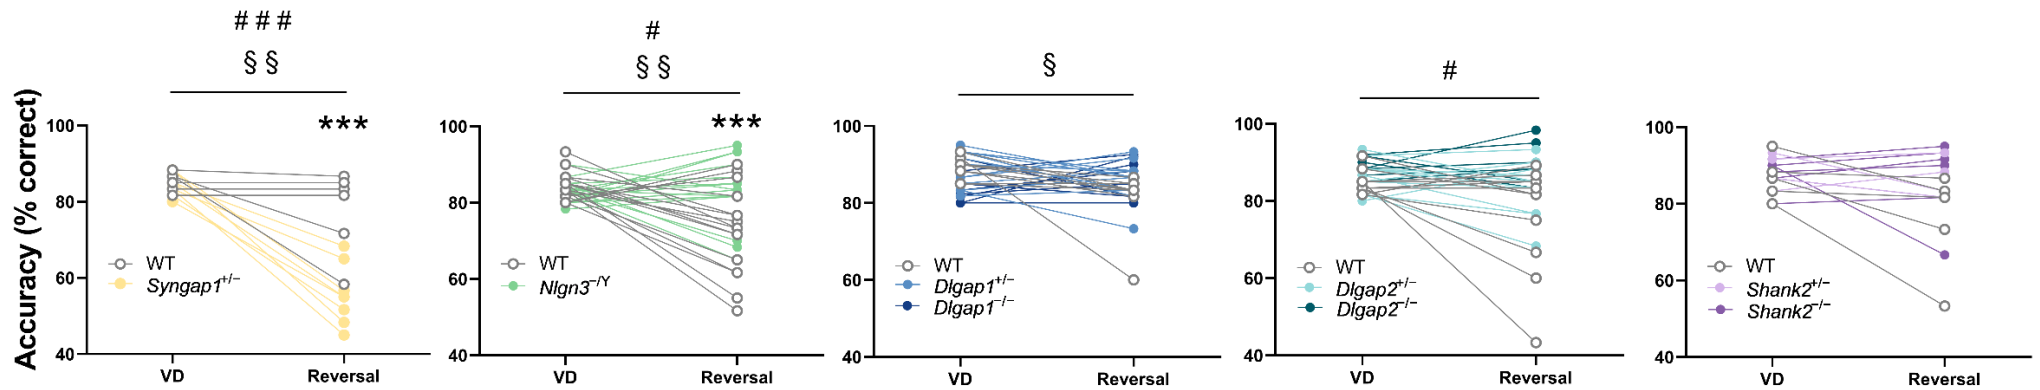

**Supporting Figure 3.** Comparison of the mean performance accuracy during the last two sessions of visual discrimination (VD) to the earliest two compound sessions when mice reached  $\geq 80\%$  during reversal learning (or compound sessions 18–19 in the event that such level of performance was not reached). Data were analysed by two-way repeated measures ANOVA and  $P$  values were not adjusted for multiple comparisons. Significant genotype  $\times$  test stage interaction effects (indicated as  $^{\S}P < 0.05$ ;  $^{\S\S}P < 0.01$ ) were followed by the *post hoc* Holm-Šidák tests to reveal significance of differences between performance of WT and mutant mice during visual discrimination and reversal learning stages ( $***P < 0.001$ ). Significant main effects of genotype are indicated as follows:  $\#P < 0.05$ ;  $\#\#P < 0.05$ ;  $\#\#\#P < 0.001$ .  $+/-$  heterozygous,  $-/-$  homozygous,  $+/+$  WT.
