# Supplementary material for: Learning and reaction times in mouse touchscreen tests are differentially impacted by mutations in genes encoding postsynaptic interacting proteins SYNGAP1, NLGN3, DLGAP1, DLGAP2 and SHANK2
Source: PubMed Central journal article supplement (PMC7615670; doi:10.1111/gbb.12723), 2020-12-29
Supplement: EMS194239-supplement-Figure_S5.pdf [file EMS194239-supplement-Figure_S5.pdf]

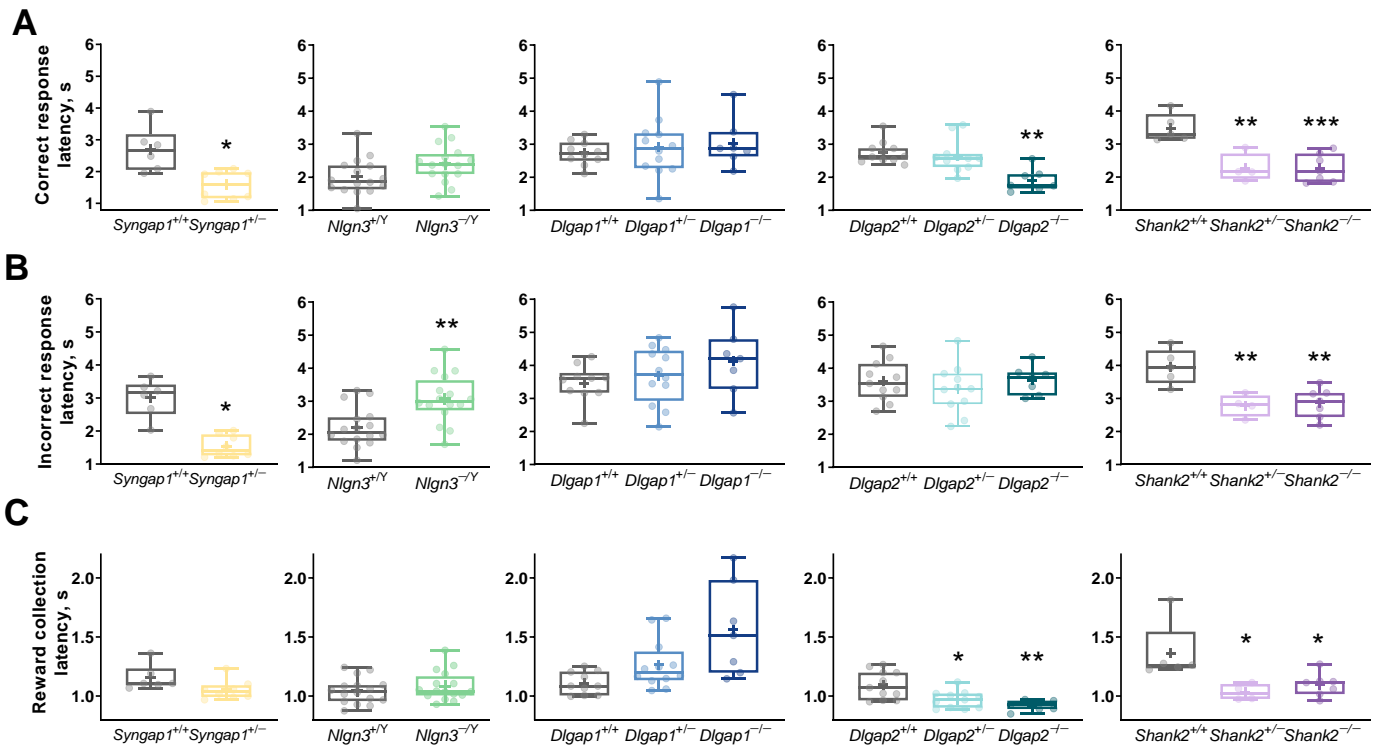

**Supporting Figure 5.** Task-level analysis of reaction times during reversal learning. Latencies to make correct (**A**) or incorrect (**B**) responses and to collect rewards (**C**) following a correct response are illustrated. Data are presented as box-whisker plots (middle line: median; box: 25th and 75th percentiles; cross: mean value; whiskers: smallest and largest values). Significant differences (mutant mice compared to respective WT littermates) are shown as follows: \* $P < 0.05$ ; \*\* $P < 0.01$ ; \*\*\* $P < 0.001$ . Each  $P$ -value for the overall genotype effect was corrected for multiple comparisons using the Holm-Šidák method.
